# Supplementary material
Source: PubMed Central journal article supplement (PMC8578393)
Supplement: NIHMS1739957-supplement-1.pdf [file NIHMS1739957-supplement-1.pdf]

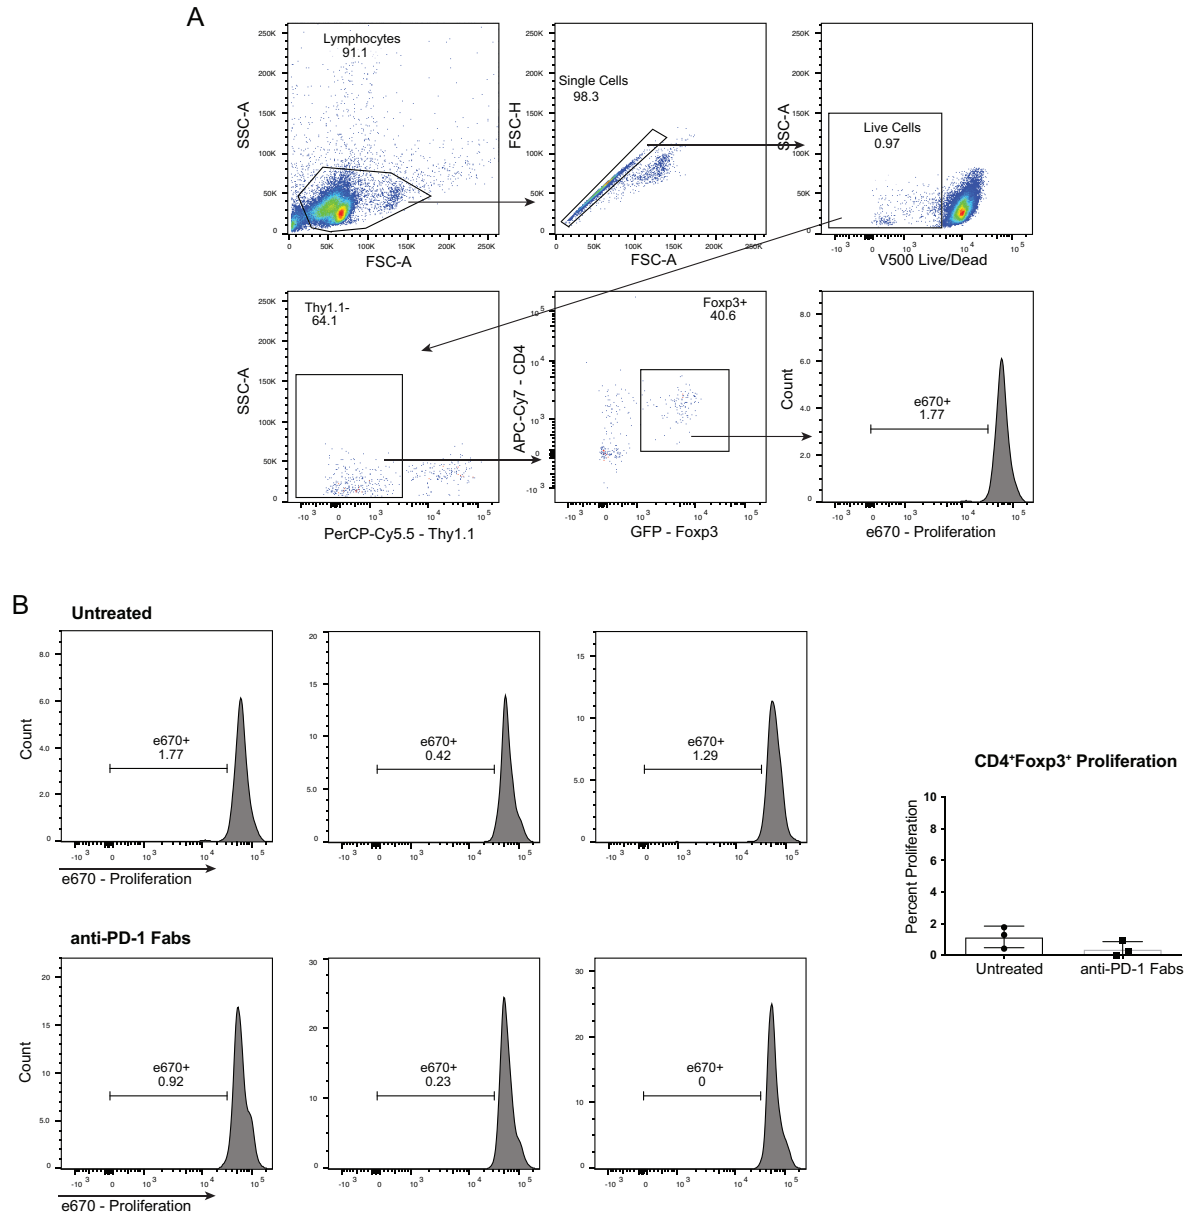

**Supplementary Figure S1: PD-1 antibody alone does not result in T<sub>reg</sub> proliferation.** Mice were injected with  $1 \times 10^4$  T11 (claudin-low) tumor cells. **(A-B)** Tumors were harvested at 150mm<sup>2</sup>, digested, enriched for lymphocytes, and GFP<sup>+</sup> T<sub>regs</sub> were sorted using MoFlo-XDP cell sorter. T<sub>regs</sub> stained with proliferation dye were incubated with or without  $\alpha$ -PD-1 Fabs and irradiated APCs without  $\alpha$ -CD3 in culture for 72 hours. **(A)** Flow cytometry gating strategy for proliferation of T<sub>regs</sub> cultured without or with  $\alpha$ -PD-1 Fabs. (n=3) **(B)** Percent proliferating CD4<sup>+</sup>Foxp3<sup>+</sup> T<sub>regs</sub> from in vitro culture.

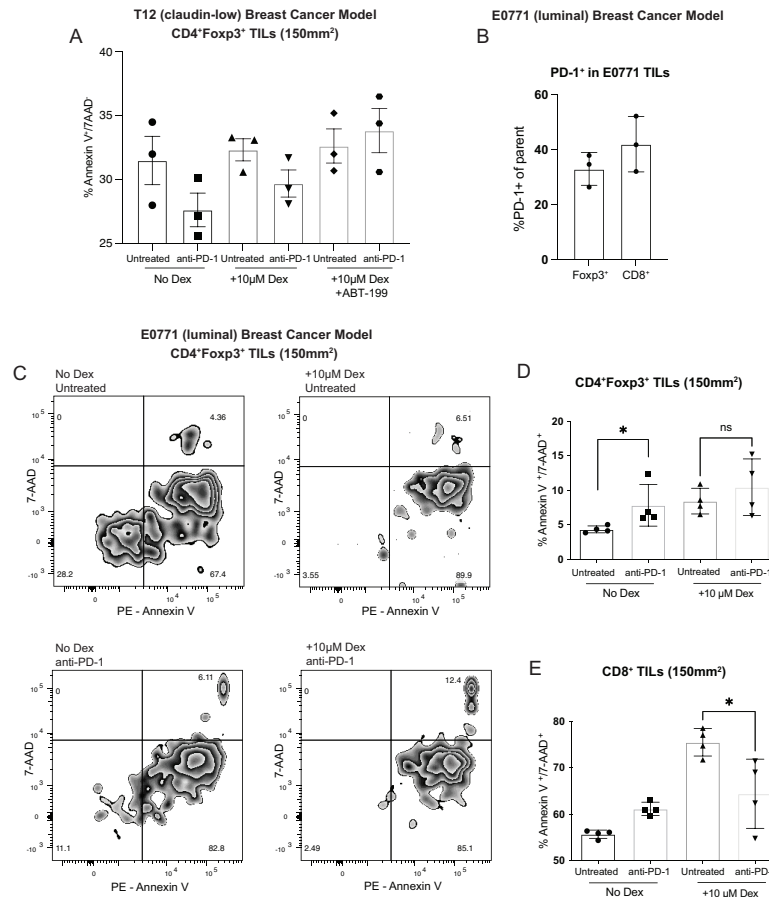

**Supplementary Figure S2. Apoptosis of T<sub>regs</sub> after PD-1 blockade in T12 (claudin-low) and E0771 (luminal) breast cancer models.** (A) BALB/c Foxp3-GFP mice were injected with  $1 \times 10^5$  T12 (claudin-low) tumor cells (n=3) or (B-E) B6 Foxp3-GFP mice were injected with  $2.5 \times 10^5$  E0771 cells (n=4). Mice were untreated or treated with 200 μg α-PD-1 antibody (J43) injected IP twice a week for the duration of the experiment. Isolated total T cells were cultured in 96 well plate in complete media or complete media + 10μM Dexamethasone + 20μM ABT-199. Apoptosis was measured using Annexin V and 7-AAD staining. (A) Percent CD4<sup>+</sup>Foxp3<sup>+</sup>7-AAD/Annexin V<sup>+</sup> T<sub>regs</sub>. (B) Percent PD-1<sup>+</sup> of T<sub>regs</sub> or CD8 T cells among E0771 TILs. (C) Representative flow plots gated on GFP<sup>+</sup> T<sub>regs</sub>. (D) Percent CD4<sup>+</sup>Foxp3<sup>+</sup>7-AAD/Annexin V<sup>+</sup> T<sub>regs</sub> from CD45<sup>+</sup> parent population. (E) Percent CD8<sup>+</sup>/7-AAD/Annexin V<sup>+</sup> T cells from CD45<sup>+</sup> parent population. Statistical significance determined by Mann-Whitney test. \* denotes  $p < 0.05$ .

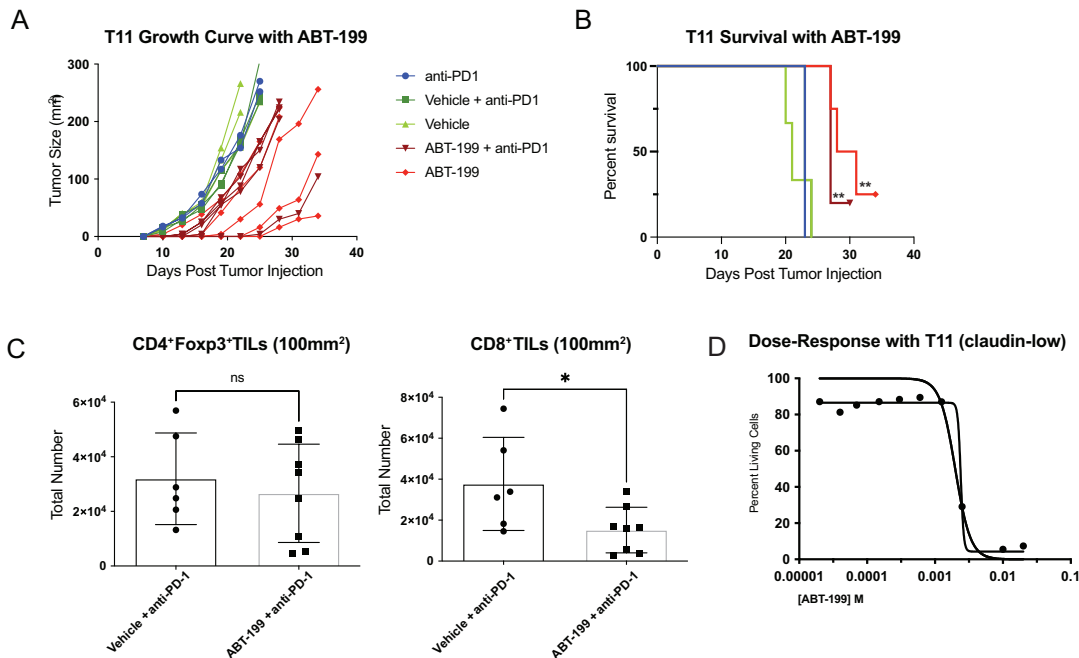

### Supplementary Figure S3: Inhibition of Bcl-2 leads to delay of tumor growth and increase in

**survival.** BALB/c mice were injected with  $1 \times 10^4$  T11 (claudin-low) tumor cells. Mice were untreated or treated with 200 $\mu$ g  $\alpha$ -PD-1 antibody (J43) injected IP twice a week for the duration of the experiment. Mice were also given ABT-199 (100mg/kg) daily, or vehicle daily by oral gavage from day +1 for the duration of the experiment. **(A)** Individual replicates of tumor growth curves. **(B)** Mice receiving Bcl-2 inhibitor ABT-199 and ABT-199 +  $\alpha$ -PD-1 ( $n = 3$ ) have a significant survival benefit compared to mice receiving vehicle ( $n=3$ ) or  $\alpha$ -PD-1 alone ( $n = 3$ ) ( $p = 0.0046$ ; log-rank test for Vehicle +  $\alpha$ -PD-1 vs ABT-199 +  $\alpha$ -PD-1) ( $p = 0.0042$ ; log-rank test for Vehicle vs ABT-199). **(C)** Tumors were harvested at 100mm<sup>2</sup>, digested, enriched for lymphocytes, and analyzed by FACS. (Vehicle +  $\alpha$ -PD-1  $n=6$ , ABT-199 +  $\alpha$ -PD-1  $n=8$ ) **(C)** Total number of CD4<sup>+</sup>Foxp3<sup>+</sup> T<sub>regs</sub>. **(D)** T11 (claudin-low) tumor cells were plated in a 96 well plate at  $1.5 \times 10^4$  cells/well and incubated for 24 hours at 37°C. ABT-199 was added at a starting concentration of 20 $\mu$ M and serially diluted. T11 cells plus ABT-199 were incubated at 37°C 5% CO<sub>2</sub> for 48 hours. Cell death was measured using Sigma MTT Cell Growth Assay.

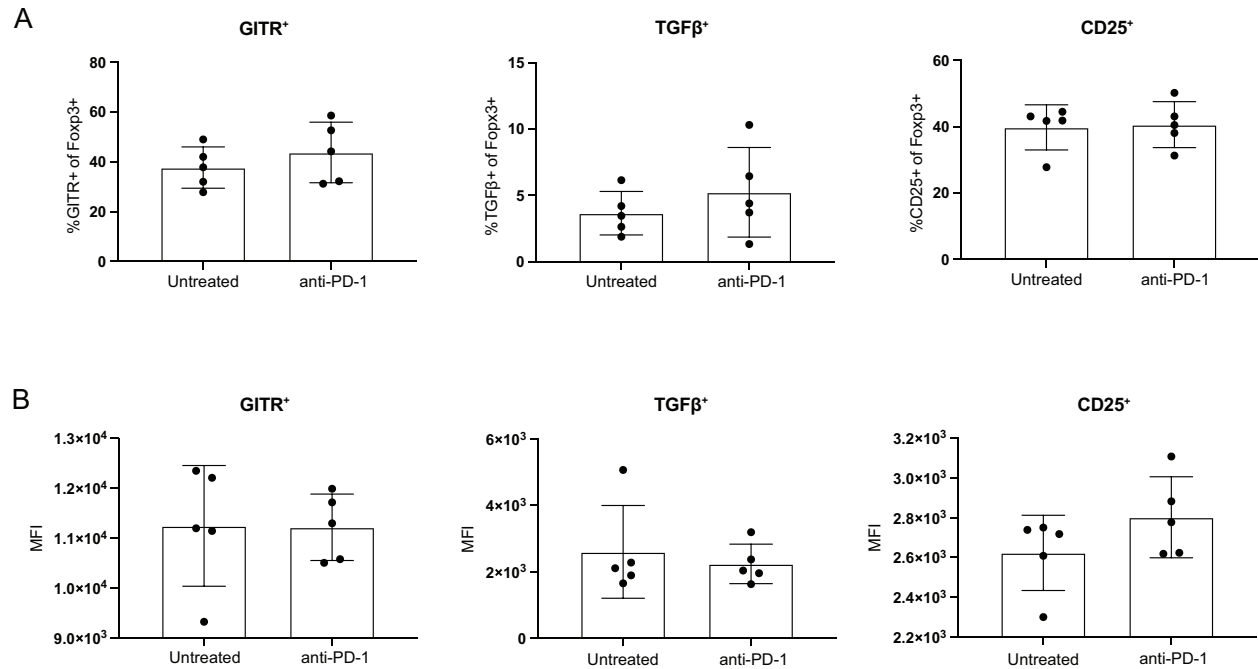

**Supplementary Figure S4: Characterization of T<sub>regs</sub> from T12 (claudin-low) tumor model. Mice**

were injected with  $1 \times 10^5$  T12 (claudin-low) tumor cells in Matrigel low-growth factor. Mice were untreated or treated with 200  $\mu\text{g}$   $\alpha$ -PD-1 antibody (J43) injected IP twice a week for the duration of the experiment. **(A-B)** Tumors were harvested at  $150\text{mm}^2$ , digested, enriched for lymphocytes, and analyzed by FACS. **(A)** Percent CD4<sup>+</sup>Foxp3<sup>+</sup> T<sub>regs</sub> expressing suppressive

molecules; GITR, TGFβ, and CD25 from mice treated with  $\alpha$ -PD-1 versus untreated (n=5). **(B)** Geometric Mean Fluorescence Intensity of suppressive molecules in CD4<sup>+</sup>Foxp3<sup>+</sup> cells (n=5).

Statistical significance determined by Mann-Whitney test.
